# Supplementary material
Source: PubMed Central journal article supplement (PMC2744610)
Supplement: jn.109.106781_1.pdf [file jn.109.106781_1.pdf]

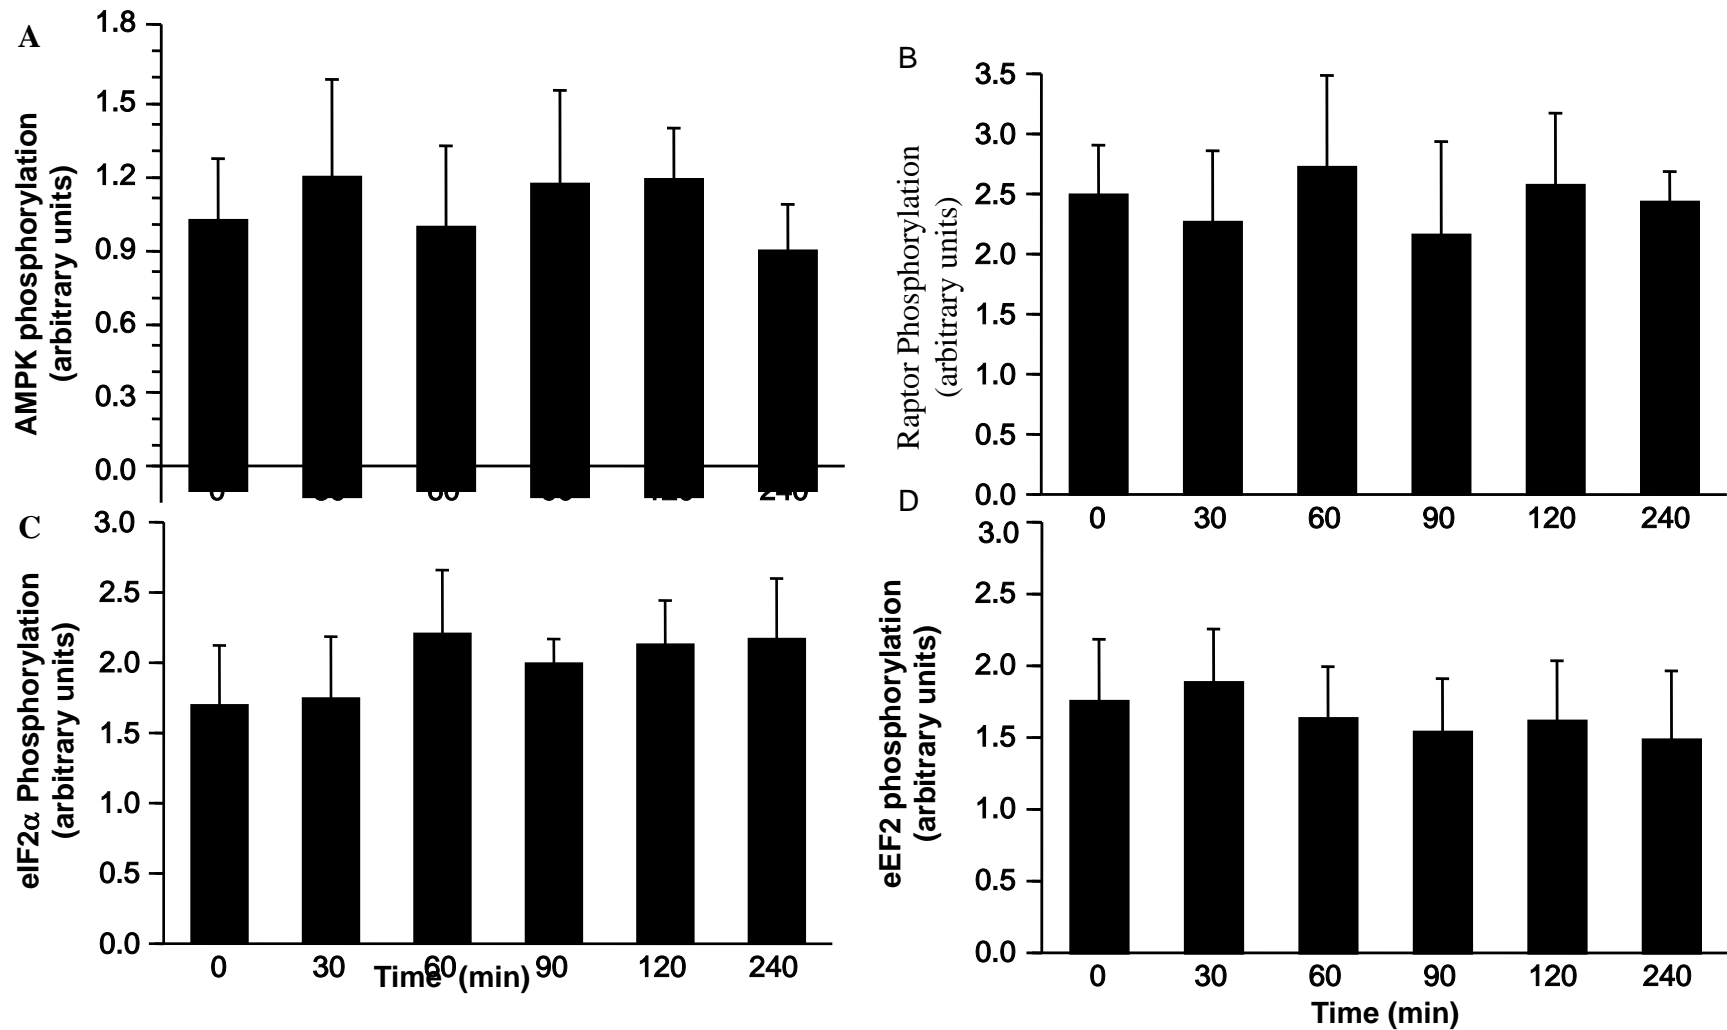

Supplemental Figure 1. Time-course of the changes in AMPK (A), raptor (B), eIF2 $\alpha$  (C) and eEF2 (D) phosphorylation in skeletal muscle of neonatal pigs after a meal. All results are corrected for total protein. Values are means  $\pm$  SEM;  $n = 6$  per time point.
