# Supplementary material
Source: PubMed Central journal article supplement (PMC2744610)
Supplement: jn.109.106781_2.pdf [file jn.109.106781_2.pdf]

**Supplemental Table 1: Time-course of plasma amino acid profiles in neonatal pigs after a meal<sup>1</sup>**

|                         | Time (min)                   |                          |                          |                         |                          |                          | P value |
|-------------------------|------------------------------|--------------------------|--------------------------|-------------------------|--------------------------|--------------------------|---------|
|                         | 0                            | 30                       | 60                       | 90                      | 120                      | 240                      |         |
| <b>Essential AA</b>     | <i>μmol · L<sup>-1</sup></i> |                          |                          |                         |                          |                          |         |
| Arg                     | 73 ± 3.5 <sup>b</sup>        | 95 ± 5.6 <sup>c</sup>    | 91 ± 5.0 <sup>c</sup>    | 73 ± 6.5 <sup>b</sup>   | 62 ± 6.0 <sup>ab</sup>   | 49 ± 6.9 <sup>a</sup>    | <0.001  |
| His                     | 49 ± 3.2                     | 55 ± 7.7                 | 55 ± 5.8                 | 52 ± 6.2                | 55 ± 4.5                 | 31 ± 6.3                 | 0.390   |
| Ile                     | 107 ± 4.8 <sup>a</sup>       | 153 ± 6.1 <sup>b</sup>   | 162 ± 5.4 <sup>b</sup>   | 154 ± 8.1 <sup>b</sup>  | 165 ± 7.9 <sup>b</sup>   | 145 ± 7.3 <sup>b</sup>   | <0.001  |
| Leu                     | 136 ± 5.0 <sup>a</sup>       | 208 ± 9.5 <sup>c</sup>   | 194 ± 10.1 <sup>bc</sup> | 203 ± 10.6 <sup>c</sup> | 195 ± 18.3 <sup>bc</sup> | 120 ± 14.4 <sup>ab</sup> | <0.001  |
| Lys                     | 110 ± 8.4 <sup>a</sup>       | 150 ± 6.4 <sup>b</sup>   | 145 ± 7.4 <sup>b</sup>   | 137 ± 8.6 <sup>ab</sup> | 132 ± 10.1 <sup>ab</sup> | 129 ± 17.9 <sup>ab</sup> | 0.009   |
| Met                     | 41 ± 1.8 <sup>a</sup>        | 49 ± 2.5 <sup>b</sup>    | 51 ± 2.5 <sup>b</sup>    | 48 ± 2.3 <sup>ab</sup>  | 48 ± 6.1 <sup>ab</sup>   | 35 ± 4.1 <sup>a</sup>    | 0.002   |
| Phe                     | 74 ± 4.0 <sup>a</sup>        | 91 ± 3.0 <sup>b</sup>    | 87 ± 3.5 <sup>ab</sup>   | 78 ± 1.5 <sup>ab</sup>  | 94 ± 6.5 <sup>ab</sup>   | ND <sup>2</sup>          | 0.002   |
| Thr                     | 170 ± 7.5 <sup>a</sup>       | 232 ± 9.8 <sup>b</sup>   | 249 ± 14.9 <sup>b</sup>  | 270 ± 23.9 <sup>b</sup> | 262 ± 31.4 <sup>b</sup>  | 185 ± 19.3 <sup>ab</sup> | <0.001  |
| Trp                     | 43 ± 3.9 <sup>a</sup>        | 57 ± 4.9 <sup>ab</sup>   | 63 ± 6.6 <sup>ab</sup>   | 60 ± 6.9 <sup>ab</sup>  | 82 ± 10.3 <sup>b</sup>   | 55 ± 8.1 <sup>ab</sup>   | 0.013   |
| Val                     | 208 ± 9.9 <sup>a</sup>       | 311 ± 12.2 <sup>b</sup>  | 327 ± 16.7 <sup>b</sup>  | 276 ± 6.3 <sup>b</sup>  | 343 ± 27.2 <sup>b</sup>  | 263 ± 19.5 <sup>ab</sup> | <0.001  |
| <b>Non-essential AA</b> |                              |                          |                          |                         |                          |                          |         |
| Ala                     | 185 ± 9.6 <sup>a</sup>       | 205 ± 14 <sup>ab</sup>   | 245 ± 15.3 <sup>ab</sup> | 286 ± 21.0 <sup>b</sup> | 288 ± 39.3 <sup>b</sup>  | 187 ± 32.6 <sup>ab</sup> | <0.001  |
| Asn                     | 29 ± 1.5 <sup>a</sup>        | 39 ± 2.5 <sup>b</sup>    | 49 ± 3.1 <sup>b</sup>    | 29 ± 4.7 <sup>a</sup>   | 39 ± 5.6 <sup>b</sup>    | 21 ± 2.1 <sup>a</sup>    | <0.001  |
| Asp                     | 20 ± 1.5 <sup>a</sup>        | 27 ± 2.1 <sup>b</sup>    | 29 ± 2.0 <sup>b</sup>    | 31 ± 2.6 <sup>bc</sup>  | 36 ± 5.3 <sup>c</sup>    | 16 ± 2.0 <sup>a</sup>    | <0.001  |
| Cit                     | 118 ± 8.0 <sup>a</sup>       | 146 ± 10.3 <sup>ab</sup> | 169 ± 14.0 <sup>b</sup>  | 153 ± 8.3 <sup>ab</sup> | 161 ± 17.1 <sup>ab</sup> | 127 ± 9.0 <sup>ab</sup>  | 0.012   |
| Gln                     | 343 ± 16.5                   | 380 ± 22                 | 356 ± 26.0               | 341 ± 31.4              | 413 ± 39.1               | 306 ± 57.4               | 0.475   |
| Glu                     | 94 ± 3.1 <sup>a</sup>        | 106 ± 5.1 <sup>a</sup>   | 114 ± 5.2 <sup>ab</sup>  | 136 ± 11.6 <sup>b</sup> | 124 ± 18.9 <sup>ab</sup> | 105 ± 25.0 <sup>ab</sup> | 0.001   |
| Gly                     | 806 ± 34.4                   | 659 ± 45                 | 703 ± 64.9               | 702 ± 68.6              | 517 ± 106.7              | 604 ± 54.0               | 0.055   |
| Orn                     | 35 ± 2.0 <sup>a</sup>        | 43 ± 3.3 <sup>ab</sup>   | 38 ± 4.3 <sup>ab</sup>   | 51 ± 3.4 <sup>b</sup>   | 47 ± 8.0 <sup>ab</sup>   | 42 ± 2.2 <sup>ab</sup>   | 0.045   |
| Pro                     | 175 ± 7.9 <sup>a</sup>       | 248 ± 14.0 <sup>b</sup>  | 251 ± 13.9 <sup>b</sup>  | 259 ± 20.0 <sup>b</sup> | 276 ± 49.7 <sup>b</sup>  | 155 ± 11.5 <sup>a</sup>  | <0.001  |
| Ser                     | 113 ± 5.9                    | 142 ± 8.5                | 132 ± 9.9                | 139 ± 12.2              | 152 ± 28.4               | 114 ± 10.4               | 0.058   |
| Tau                     | 45 ± 3.1                     | 43 ± 2.8                 | 44 ± 3.9                 | 30 ± 1.1                | 28 ± 2.8                 | 26 ± 2.0                 | 0.056   |
| Tyr                     | 65 ± 4.1 <sup>a</sup>        | 86 ± 4.7 <sup>b</sup>    | 100 ± 5.7 <sup>b</sup>   | 98 ± 9.4 <sup>b</sup>   | 99 ± 4.8 <sup>b</sup>    | 113 ± 8.7 <sup>b</sup>   | <0.001  |

<sup>1</sup>Values are means ± SEM, n = 6-36. Means in a row with superscripts without a common letter differ, P < 0.05. <sup>2</sup>No data are available for phenylalanine at 240 min as the bolus dose of [<sup>3</sup>H] phenylalanine for protein synthesis analysis artificially raised circulating levels of phenylalanine.
